# Supplementary material for: Trait Energy and Fatigue Modify the Effects of Caffeine on Mood, Cognitive and Fine-Motor Task Performance: A Post-Hoc Study
Source: PubMed Central journal article supplement (PMC7912474; doi:10.3390/nu13020412), 2021-01-28
Supplement: nutrients-13-00412-s001.pdf [file nutrients-13-00412-s001.pdf]

**FOR SUPPLEMENTAL MATERIALS**

**Trait and caffeine influence on moods, cognitive tasks and fine motor tasks (all findings with significant differences are in bold)**

| Factor                | Measure        | Beta          | 2.5%          | 97.5%         | t stat        | p value      |
|-----------------------|----------------|---------------|---------------|---------------|---------------|--------------|
| TPE                   | <b>Vigor</b>   | <b>-3.234</b> | <b>-5.686</b> | <b>-0.783</b> | <b>-2.586</b> | <b>0.014</b> |
| Caffeine              | Vigor          | 0.763         | -0.221        | 1.747         | 1.520         | 0.132        |
| TPE x Caffeine        | Vigor          | -0.536        | -2.161        | 1.089         | -0.646        | 0.520        |
| TPF                   | Vigor          | 0.400         | -2.266        | 3.066         | 0.294         | 0.771        |
| <b>Caffeine</b>       | <b>Vigor</b>   | <b>1.300</b>  | <b>0.211</b>  | <b>2.389</b>  | <b>2.341</b>  | <b>0.022</b> |
| TPF x Caffeine        | Vigor          | -1.467        | -3.006        | 0.073         | -1.867        | 0.065        |
| TME                   | Vigor          | -2.545        | -5.446        | 0.355         | -1.720        | 0.095        |
| Caffeine              | Vigor          | 0.432         | -0.483        | 1.347         | 0.925         | 0.357        |
| TME x Caffeine        | Vigor          | 0.506         | -1.266        | 2.277         | 0.559         | 0.577        |
| TMF                   | Vigor          | 0.451         | -2.216        | 3.117         | 0.331         | 0.742        |
| <b>Caffeine</b>       | <b>Vigor</b>   | <b>1.437</b>  | <b>0.396</b>  | <b>2.479</b>  | <b>2.706</b>  | <b>0.008</b> |
| <b>TMF x Caffeine</b> | <b>Vigor</b>   | <b>-1.866</b> | <b>-3.390</b> | <b>-0.342</b> | <b>-2.400</b> | <b>0.019</b> |
| TPE                   | Fatigue        | 1.730         | 0.0550        | 3.404         | 2.025         | 0.050        |
| Caffeine              | Fatigue        | -0.105        | -0.879        | 0.669         | -0.267        | 0.790        |
| TPE x Caffeine        | Fatigue        | -0.031        | -1.310        | 1.247         | -0.048        | 0.962        |
| TPF                   | Fatigue        | 0.633         | -1.049        | 2.316         | 0.738         | 0.465        |
| Caffeine              | Fatigue        | -0.500        | -1.364        | 0.364         | -1.134        | 0.260        |
| TPF x Caffeine        | Fatigue        | 0.767         | -0.455        | 1.988         | 1.230         | 0.222        |
| TME                   | Fatigue        | 0.409         | -1.537        | 2.355         | 0.412         | 0.683        |
| Caffeine              | Fatigue        | -0.114        | -0.833        | 0.606         | -0.310        | 0.758        |
| TME x Caffeine        | Fatigue        | -0.011        | -1.405        | 1.382         | -0.016        | 0.987        |
| TMF                   | Fatigue        | 0.228         | -1.469        | 1.924         | 0.263         | 0.794        |
| Caffeine              | Fatigue        | -0.688        | -1.513        | 0.138         | -1.633        | 0.106        |
| TMF x Caffeine        | Fatigue        | 1.223         | 0.015         | 2.431         | 1.984         | 0.050        |
| TPE                   | Tension        | 0.419         | -0.182        | 1.019         | 1.367         | 0.178        |
| Caffeine              | Tension        | 0.263         | -0.080        | 0.607         | 1.502         | 0.137        |
| TPE x Caffeine        | Tension        | -0.081        | -0.648        | 0.486         | -0.281        | 0.779        |
| TPF                   | Tension        | 0.367         | -0.423        | 0.356         | 1.222         | 0.229        |
| <b>Caffeine</b>       | <b>Tension</b> | <b>0.633</b>  | <b>0.265</b>  | <b>1.001</b>  | <b>3.372</b>  | <b>0.001</b> |
| <b>TPF x Caffeine</b> | <b>Tension</b> | <b>-0.800</b> | <b>-1.321</b> | <b>-0.279</b> | <b>-3.012</b> | <b>0.003</b> |
| TME                   | Tension        | 0.199         | -0.363        | 0.699         | 0.583         | 0.563        |
| Caffeine              | Tension        | 0.250         | -0.069        | 0.569         | 1.535         | 0.128        |
| TME x Caffeine        | Tension        | -0.062        | -0.681        | 0.556         | -0.198        | 0.843        |
| TMF                   | Tension        | 0.357         | -0.194        | 0.605         | 1.187         | 0.242        |
| Caffeine              | Tension        | 0.375         | 0.003         | 0.747         | 1.977         | 0.051        |
| TMF x Caffeine        | Tension        | -0.304        | -0.848        | 0.241         | -1.093        | 0.277        |
| TPE                   | Anger          | 0.115         | -0.357        | 0.587         | 0.477         | 0.635        |
| Caffeine              | Anger          | 0.211         | -0.128        | 0.549         | 1.220         | 0.226        |
| TPE x Caffeine        | Anger          | 0.471         | -0.087        | 1.030         | 1.654         | 0.102        |
| TPF                   | Anger          | 0.067         | -0.407        | 0.541         | 0.276         | 0.784        |
| <b>Caffeine</b>       | <b>Anger</b>   | <b>0.400</b>  | <b>0.013</b>  | <b>0.787</b>  | <b>2.028</b>  | <b>0.046</b> |
| TPF x Caffeine        | Anger          | -0.033        | -0.58         | 0.513         | -0.120        | 0.905        |
| TME                   | Anger          | -0.187        | -0.721        | 0.346         | -0.689        | 0.493        |
| <b>Caffeine</b>       | <b>Anger</b>   | <b>0.364</b>  | <b>0.045</b>  | <b>0.683</b>  | <b>2.234</b>  | <b>0.028</b> |
| TME x Caffeine        | Anger          | 0.074         | -0.544        | 0.692         | 0.234         | 0.815        |
| TMF                   | Anger          | 0.161         | -0.310        | 0.632         | 0.669         | 0.506        |

|                       |                         |               |               |               |               |              |
|-----------------------|-------------------------|---------------|---------------|---------------|---------------|--------------|
| Caffeine              | Anger                   | 0.375         | 0.001         | 0.749         | 1.964         | 0.053        |
| TMF x Caffeine        | Anger                   | 0.018         | -0.530        | 0.566         | 0.064         | 0.949        |
| TPE                   | Depression              | 0.244         | -0.241        | 0.729         | 0.986         | 0.331        |
| Caffeine              | Depression              | -0.053        | -0.241        | 0.136         | -0.548        | 0.585        |
| TPE x Caffeine        | Depression              | 0.053         | -0.258        | 0.364         | 0.332         | 0.741        |
| TPF                   | Depression              | 0.400         | -0.064        | 0.864         | 1.691         | 0.100        |
| Caffeine              | Depression              | 0.067         | -0.143        | 0.277         | 0.622         | 0.536        |
| TPF x Caffeine        | Depression              | -0.200        | -0.497        | 0.097         | -1.319        | 0.190        |
| TME                   | Depression              | 0.358         | -0.158        | 0.874         | 1.360         | 0.183        |
| Caffeine              | Depression              | -0.068        | -0.243        | 0.106         | -0.765        | 0.446        |
| TME x Caffeine        | Depression              | 0.131         | -0.207        | 0.469         | 0.757         | 0.451        |
| TMF                   | Depression              | 0.442         | -0.024        | 0.908         | 1.858         | 0.072        |
| Caffeine              | Depression              | 0.125         | -0.075        | 0.325         | 1.227         | 0.223        |
| <b>TMF x Caffeine</b> | <b>Depression</b>       | <b>-0.339</b> | <b>-0.632</b> | <b>-0.047</b> | <b>-2.276</b> | <b>0.025</b> |
| TPE                   | <b>Confusion</b>        | <b>0.830</b>  | <b>0.033</b>  | <b>1.628</b>  | <b>2.040</b>  | <b>0.047</b> |
| Caffeine              | Confusion               | -0.053        | -0.557        | 0.452         | -0.205        | 0.838        |
| TPE x Caffeine        | Confusion               | 0.507         | -0.326        | 1.340         | 1.194         | 0.236        |
| TPF                   | Confusion               | 0.500         | -0.344        | 1.344         | 1.160         | 0.252        |
| Caffeine              | Confusion               | 0.167         | -0.405        | 0.739         | 0.571         | 0.569        |
| TPF x Caffeine        | Confusion               | -0.067        | -0.876        | 0.742         | -0.162        | 0.872        |
| TME                   | Confusion               | 0.500         | -0.460        | 1.460         | 1.021         | 0.313        |
| Caffeine              | Confusion               | 0.159         | -0.313        | 0.631         | 0.660         | 0.511        |
| TME x Caffeine        | Confusion               | -0.097        | -1.011        | 0.818         | -0.207        | 0.836        |
| TMF                   | Confusion               | 0.420         | -0.432        | 1.271         | 0.966         | 0.339        |
| Caffeine              | Confusion               | 0.156         | -0.398        | 0.710         | 0.553         | 0.582        |
| TMF x Caffeine        | Confusion               | -0.049        | -0.860        | 0.762         | -0.119        | 0.906        |
| TPE                   | <b>Motivation</b>       | <b>-1.469</b> | <b>-2.827</b> | <b>-0.111</b> | <b>-2.121</b> | <b>0.040</b> |
| Caffeine              | Motivation              | 0.053         | -0.627        | 0.732         | 0.152         | 0.880        |
| TPE x Caffeine        | Motivation              | 0.402         | -0.721        | 1.525         | 0.702         | 0.485        |
| TPF                   | Motivation              | 0.067         | -1.314        | 1.448         | 0.095         | 0.925        |
| Caffeine              | Motivation              | 0.500         | -0.262        | 1.262         | 1.286         | 0.202        |
| TPF x Caffeine        | Motivation              | -0.600        | -1.678        | 0.478         | -1.091        | 0.278        |
| TME                   | Motivation              | -0.517        | -2.076        | 1.042         | -0.65         | 0.520        |
| Caffeine              | Motivation              | 0.136         | -0.497        | 0.769         | 0.422         | 0.674        |
| TME x Caffeine        | Motivation              | 0.239         | -0.987        | 1.465         | 0.382         | 0.704        |
| TMF                   | Motivation              | 0.478         | -0.902        | 1.858         | 0.679         | 0.502        |
| <b>Caffeine</b>       | <b>Motivation</b>       | <b>0.812</b>  | <b>0.094</b>  | <b>1.531</b>  | <b>2.215</b>  | <b>0.029</b> |
| <b>TMF x Caffeine</b> | <b>Motivation</b>       | <b>-1.312</b> | <b>-2.365</b> | <b>-0.260</b> | <b>-2.444</b> | <b>0.017</b> |
| TPE                   | Physical Energy         | 1.842         | -1.057        | 4.742         | 1.245         | 0.218        |
| Caffeine              | Physical Energy         | 0.526         | -1.410        | 2.463         | 0.533         | 0.596        |
| TPE x Caffeine        | Physical Energy         | -2.072        | -5.270        | 1.127         | -1.270        | 0.208        |
| TPF                   | Physical Energy         | 1.200         | -1.607        | 4.007         | 0.838         | 0.406        |
| Caffeine              | Physical Energy         | 0.900         | -1.274        | 3.074         | 0.811         | 0.419        |
| TPF x Caffeine        | Physical Energy         | -2.267        | -5.341        | 0.808         | -1.445        | 0.152        |
| TME                   | Physical Energy         | -0.284        | -3.450        | 2.881         | -0.176        | 0.861        |
| Caffeine              | Physical Energy         | 0.091         | -1.721        | 1.902         | 0.098         | 0.922        |
| TME x Caffeine        | Physical Energy         | -1.216        | -4.724        | 2.292         | -0.679        | 0.499        |
| TMF                   | Physical Energy         | 0.714         | -2.105        | 3.534         | 0.497         | 0.621        |
| Caffeine              | Physical Energy         | 0.094         | -2.034        | 2.221         | 0.086         | 0.931        |
| TMF x Caffeine        | Physical Energy         | -0.701        | -3.815        | 2.413         | -0.441        | 0.660        |
| TPE                   | <b>Physical Fatigue</b> | <b>-4.926</b> | <b>-8.137</b> | <b>-1.715</b> | <b>-3.007</b> | <b>0.004</b> |
| Caffeine              | Physical Fatigue        | 0.974         | -1.236        | 3.183         | 0.864         | 0.390        |

|                       |                         |               |                |               |               |              |
|-----------------------|-------------------------|---------------|----------------|---------------|---------------|--------------|
| TPE x Caffeine        | Physical Fatigue        | 2.799         | -0.850         | 6.448         | 1.503         | 0.136        |
| TPF                   | Physical Fatigue        | 0.167         | -3.105         | 3.438         | 0.100         | 0.921        |
| Caffeine              | Physical Fatigue        | 0.400         | -2.074         | 2.874         | 0.317         | 0.752        |
| TPF x Caffeine        | Physical Fatigue        | 3.200         | -0.298         | 6.698         | 1.793         | 0.076        |
| TME                   | Physical Fatigue        | -2.875        | -6.623         | 0.873         | -1.503        | 0.139        |
| Caffeine              | Physical Fatigue        | 0.568         | -1.429         | 2.565         | 0.558         | 0.579        |
| <b>TME x Caffeine</b> | <b>Physical Fatigue</b> | <b>5.369</b>  | <b>1.502</b>   | <b>9.237</b>  | <b>2.721</b>  | <b>0.008</b> |
| TMF                   | Physical Fatigue        | 0.701         | -2.604         | 4.005         | 0.416         | 0.679        |
| Caffeine              | Physical Fatigue        | 1.188         | -1.238         | 3.613         | 0.959         | 0.340        |
| TMF x Caffeine        | Physical Fatigue        | 1.741         | -1.810         | 5.292         | 0.961         | 0.339        |
| TPE                   | Mental Energy           | 1.108         | -1.862         | 4.077         | 0.731         | 0.468        |
| Caffeine              | Mental Energy           | 0.474         | -1.445         | 2.393         | 0.484         | 0.630        |
| TPE x Caffeine        | Mental Energy           | -1.474        | -4.643         | 1.695         | -0.911        | 0.365        |
| TPF                   | Mental Energy           | 0.100         | -2.740         | 2.940         | 0.069         | 0.945        |
| Caffeine              | Mental Energy           | 0.967         | -1.182         | 3.115         | 0.882         | 0.380        |
| TPF x Caffeine        | Mental Energy           | -2.067        | -5.105         | 0.972         | -1.333        | 0.186        |
| TME                   | Mental Energy           | -0.500        | -3.718         | 2.718         | -0.304        | 0.762        |
| Caffeine              | Mental Energy           | 0.227         | -1.561         | 2.015         | 0.249         | 0.804        |
| TME x Caffeine        | Mental Energy           | -1.102        | -4.564         | 2.360         | -0.624        | 0.534        |
| TMF                   | Mental Energy           | -0.487        | -3.340         | 2.367         | -0.334        | 0.740        |
| Caffeine              | Mental Energy           | 0.344         | -1.753         | 2.441         | 0.321         | 0.749        |
| TMF x Caffeine        | Mental Energy           | -0.879        | -3.950         | 2.191         | -0.561        | 0.576        |
| <b>TPE</b>            | <b>Mental Fatigue</b>   | <b>-4.483</b> | <b>-7.678</b>  | <b>-1.289</b> | <b>-2.751</b> | <b>0.008</b> |
| Caffeine              | Mental Fatigue          | 1.026         | -1.206         | 3.258         | 0.901         | 0.370        |
| TPE x Caffeine        | Mental Fatigue          | 1.974         | -1.712         | 5.660         | 1.049         | 0.297        |
| TPF                   | Mental Fatigue          | 0.333         | -2.921         | 3.587         | 0.201         | 0.842        |
| Caffeine              | Mental Fatigue          | 0.367         | -2.128         | 2.861         | 0.288         | 0.774        |
| TPF x Caffeine        | Mental Fatigue          | 2.767         | -0.761         | 6.294         | 1.537         | 0.128        |
| TME                   | Mental Fatigue          | -2.562        | -6.286         | 1.161         | -1.349        | 0.183        |
| Caffeine              | Mental Fatigue          | 0.364         | -1.647         | 2.374         | 0.355         | 0.724        |
| <b>TME x Caffeine</b> | <b>Mental Fatigue</b>   | <b>5.199</b>  | <b>1.306</b>   | <b>9.092</b>  | <b>2.617</b>  | <b>0.010</b> |
| TMF                   | Mental Fatigue          | 0.746         | -2.543         | 4.034         | 0.444         | 0.659        |
| Caffeine              | Mental Fatigue          | 1.094         | -1.345         | 3.533         | 0.879         | 0.382        |
| TMF x Caffeine        | Mental Fatigue          | 1.406         | -2.164         | 4.977         | 0.772         | 0.442        |
| TPE                   | Sub3total               | 4.909         | -1.770         | 11.588        | 1.441         | 0.159        |
| Caffeine              | Sub3total               | -0.289        | -2.626         | 2.047         | -0.243        | 0.809        |
| TPE x Caffeine        | Sub3total               | 0.153         | -3.706         | 4.012         | 0.078         | 0.938        |
| TPF                   | Sub3total               | -0.333        | -6.960         | 6.294         | -0.099        | 0.922        |
| Caffeine              | Sub3total               | -2.433        | -4.982         | 0.115         | -1.872        | 0.065        |
| <b>TPF x Caffeine</b> | <b>Sub3total</b>        | <b>4.400</b>  | <b>0.796</b>   | <b>8.004</b>  | <b>2.393</b>  | <b>0.019</b> |
| TME                   | Sub3total               | <b>9.222</b>  | <b>2.045</b>   | <b>16.398</b> | <b>2.519</b>  | <b>0.017</b> |
| Caffeine              | Sub3total               | 1.432         | -0.633         | 3.496         | 1.359         | 0.177        |
| <b>TME x Caffeine</b> | <b>Sub3total</b>        | <b>-6.244</b> | <b>-10.242</b> | <b>-2.247</b> | <b>-3.062</b> | <b>0.003</b> |
| TMF                   | Sub3total               | -1.165        | -7.804         | 5.474         | -0.344        | 0.733        |
| <b>Caffeine</b>       | <b>Sub3total</b>        | <b>-2.875</b> | <b>-5.290</b>  | <b>-0.46</b>  | <b>-2.334</b> | <b>0.022</b> |
| <b>TMF x Caffeine</b> | <b>Sub3total</b>        | <b>5.661</b>  | <b>2.126</b>   | <b>9.196</b>  | <b>3.139</b>  | <b>0.002</b> |
| TPE                   | Sub7total               | 2.208         | -3.389         | 7.806         | 0.773         | 0.445        |
| <b>Caffeine</b>       | <b>Sub7total</b>        | <b>2.632</b>  | <b>0.518</b>   | <b>4.746</b>  | <b>2.440</b>  | <b>0.017</b> |
| TPE x Caffeine        | Sub7total               | -0.859        | -4.350         | 2.632         | -0.482        | 0.631        |
| TPF                   | Sub7total               | 0.767         | -4.629         | 6.162         | 0.279         | 0.782        |
| Caffeine              | Sub7total               | 1.433         | -0.935         | 3.801         | 1.186         | 0.239        |
| TPF x Caffeine        | Sub7total               | 1.767         | -1.582         | 5.116         | 1.034         | 0.304        |

|                       |                  |               |                |               |               |              |
|-----------------------|------------------|---------------|----------------|---------------|---------------|--------------|
| <b>TME</b>            | <b>Sub7total</b> | <b>6.858</b>  | <b>1.106</b>   | <b>12.61</b>  | <b>2.337</b>  | <b>0.025</b> |
| <b>Caffeine</b>       | <b>Sub7total</b> | <b>2.886</b>  | <b>0.933</b>   | <b>4.840</b>  | <b>2.896</b>  | <b>0.005</b> |
| TME x Caffeine        | Sub7total        | -2.136        | -5.920         | 1.647         | -1.107        | 0.271        |
| TMF                   | Sub7total        | -1.937        | -7.354         | 3.479         | -0.701        | 0.488        |
| Caffeine              | Sub7total        | 0.000         | -2.195         | 2.195         | <0.001        | >0.999       |
| <b>TMF x Caffeine</b> | <b>Sub7total</b> | <b>4.964</b>  | <b>1.751</b>   | <b>8.178</b>  | <b>3.028</b>  | <b>0.003</b> |
| TPE                   | DH               | 2.024         | -10.234        | 14.282        | 0.324         | 0.748        |
| Caffeine              | DH               | -1.368        | -5.254         | 2.517         | -0.690        | 0.492        |
| TPE x Caffeine        | DH               | -0.132        | -6.548         | 6.285         | -0.040        | 0.968        |
| TPF                   | DH               | 6.733         | -5.036         | 18.503        | 1.121         | 0.271        |
| Caffeine              | DH               | 3.300         | -0.845         | 7.445         | 1.560         | 0.122        |
| <b>TPF x Caffeine</b> | <b>DH</b>        | <b>-9.433</b> | <b>-15.295</b> | <b>-3.572</b> | <b>-3.154</b> | <b>0.002</b> |
| TME                   | DH               | 2.097         | -11.121        | 15.314        | 0.311         | 0.758        |
| Caffeine              | DH               | -3.136        | -6.679         | 0.407         | -1.735        | 0.086        |
| TME x Caffeine        | DH               | 6.449         | -0.412         | 13.31         | 1.842         | 0.069        |
| TMF                   | DH               | 3.000         | -8.813         | 14.813        | 0.498         | 0.622        |
| Caffeine              | DH               | 2.719         | -1.322         | 6.759         | 1.319         | 0.191        |
| <b>TMF x Caffeine</b> | <b>DH</b>        | <b>-8.862</b> | <b>-14.777</b> | <b>-2.947</b> | <b>-2.936</b> | <b>0.004</b> |
| TPE                   | NDH              | 6.612         | -5.652         | 18.877        | 1.057         | 0.299        |
| Caffeine              | NDH              | 0.237         | -3.435         | 3.909         | 0.126         | 0.900        |
| TPE x Caffeine        | NDH              | -5.600        | -11.665        | 0.464         | -1.81         | 0.074        |
| TPF                   | NDH              | 1.267         | -10.571        | 13.105        | 0.210         | 0.835        |
| Caffeine              | NDH              | 2.200         | -1.838         | 6.238         | 1.068         | 0.289        |
| <b>TPF x Caffeine</b> | <b>NDH</b>       | <b>-8.033</b> | <b>-13.744</b> | <b>-2.322</b> | <b>-2.757</b> | <b>0.007</b> |
| TME                   | NDH              | 4.409         | -8.908         | 17.727        | 0.649         | 0.521        |
| Caffeine              | NDH              | -2.341        | -5.810         | 1.128         | -1.323        | 0.189        |
| TME x Caffeine        | NDH              | 1.966         | -4.752         | 8.684         | 0.574         | 0.568        |
| TMF                   | NDH              | -2.844        | -14.481        | 8.793         | -0.479        | 0.635        |
| Caffeine              | NDH              | 1.906         | -2.007         | 5.819         | 0.955         | 0.342        |
| <b>TMF x Caffeine</b> | <b>NDH</b>       | <b>-7.978</b> | <b>-13.706</b> | <b>-2.250</b> | <b>-2.730</b> | <b>0.008</b> |

TPE= Trait Physical Energy, TPF= Trait Physical Fatigue, TME= Trait Mental Energy, TMF= Trait Mental Fatigue, DH= Dominant Hand, NDH= Non-dominant hand
